# Supplementary material for: CFAP45 deficiency causes situs abnormalities and asthenospermia by disrupting an axonemal adenine nucleotide homeostasis module
Source: PubMed Central journal article supplement (PMC7606486; doi:10.1038/s41467-020-19113-0), 2020-11-02
Supplement: 41467_2020_19113_MOESM3_ESM.pdf [file 41467_2020_19113_MOESM3_ESM.pdf]

## Description of Additional Supplementary Files

File Name: Supplementary Data 1

Description: Overview of CFAP45 and CFAP52 associations

File Name: Supplementary Movie 1

Description: Flagellar beating of healthy control human sperm

File Name: Supplementary Movie 2

Description: Flagellar beating of *CFAP45*-deficient sperm from individual OP-28 II1

File Name: Supplementary Movie 3

Description: Nodal ciliary beating of a *Cfap45*<sup>+/-</sup> embryo

File Name: Supplementary Movie 4

Description: Nodal ciliary beating of a *Cfap45*<sup>-/-</sup> embryo

File Name: Supplementary Movie 5

Description: Flagellar beating of sperm from a *Cfap45*<sup>+/-</sup> male mouse

File Name: Supplementary Movie 6

Description: Flagellar beating of sperm from a *Cfap45*<sup>-/-</sup> male mouse
